# Supplementary material
Source: PubMed Central journal article supplement (PMC3061537)

**Article Title: A TLR4-interacting Surfactant Protein-A-derived Peptide Suppresses TNF- $\alpha$  Release from Mouse JAWS II Dendritic Cells.**

**Authors: Awasthi S, Brown K, King C, Awasthi V, Bondugula R. J Pharmacol Exper Ther.**

**Supplemental Data (1):** Characterization of purified native baboon lung SP-A. (A): Purified baboon SP-A (5  $\mu$ g in each lane) protein was run under reducing (+ heating, + DTT) and partially-reducing (+ heating, no DTT) condition on SDS-PAGE gel and stained with SYPRO-ruby stain.

(B): Immunoreactivity of purified SP-A (5  $\mu$ g) by western blotting with SP-A-specific antibody. The SP-A protein was run on reducing SDS-PAGE gel prior to western blotting.

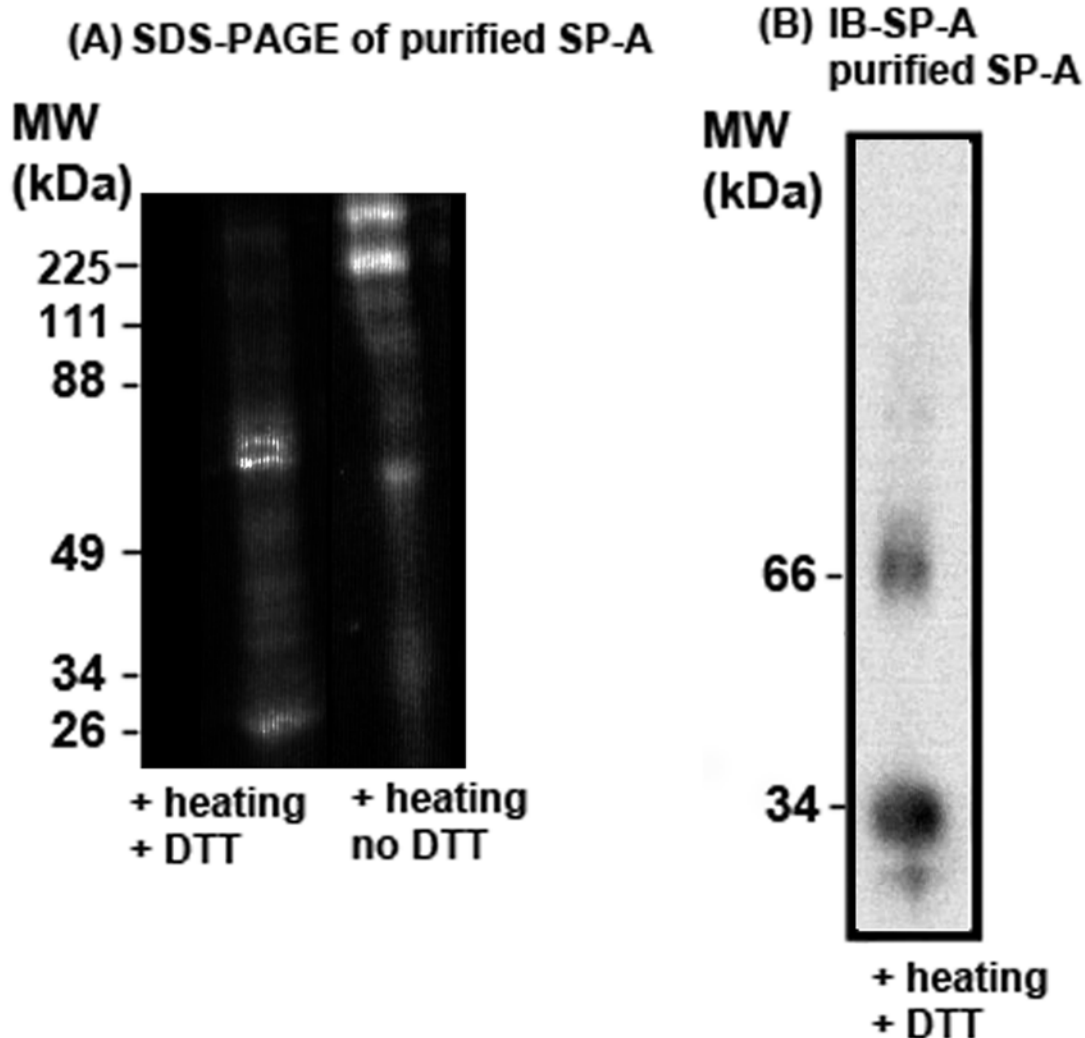

Supplement: supp_110.173765_JPET173765Supplemental_data_1.pdf [file supp_110.173765_JPET173765Supplemental_data_1.pdf]
